# Supplementary material for: Benthic foraminifera and gromiids from oxygen-depleted environments – survival strategies, biogeochemistry and trophic interactions
Source: Copernicus journal article supplement (doi:10.5194/bg-20-3423-2023), 2023-08-17
Supplement: Supplementary file 1 [file bg-20-3423-2023-supplement.pdf]

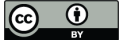

*Supplement of*

**Benthic foraminifera and gromiids from oxygen-depleted environments – survival strategies, biogeochemistry and trophic interactions**

**Nicolaas Glock**

*Correspondence to:* Nicolaas Glock ([nicolaas.glock@uni-hamburg.de](mailto:nicolaas.glock@uni-hamburg.de))

The copyright of individual parts of the supplement might differ from the article licence.

There is a statement in the main text mentioning that two extreme datapoints from literature were excluded as outliers for the power regression that is shown in figure 6. This concerns the entries for *Canceris inflatus*, that is listed with an extremely high individual intracellular NO<sub>3</sub><sup>-</sup> content (263877 pmol ind<sup>-1</sup>) and a high but realistic intracellular NO<sub>3</sub><sup>-</sup> concentration (262 mM), and *Globobulimina cf. ovula*, that is listed with an unusual small biovolume ( $1.0 \pm 2.3 \times 10^6 \mu\text{m}^3$ ), which is lower than its standard error of the mean (Piña-Ochoa et al., 2010). Both species are listed with a more or less average intracellular NO<sub>3</sub><sup>-</sup> concentration. Both entries have in common, that if the intracellular NO<sub>3</sub><sup>-</sup> concentration (in mM) is calculated from the listed biovolume and the intracellular NO<sub>3</sub><sup>-</sup> content (in pmol ind<sup>-1</sup>), the resulting intracellular NO<sub>3</sub><sup>-</sup> concentration is an order of magnitude higher than the listed value. This is likely just a digit problem with one of the floating numbers in these entries.
